# Supplementary material
Source: publisher figshare collection journal article supplement (https://asha.figshare.com/articles/dataset/_/27307251)
Supplement: Supplementary file 1 [file 1]

**Supplemental Material S4.** Pairwise contrasts of group differences for significant Emotion  $\times$  Group and Channel  $\times$  Emotion  $\times$  Group interactions in accuracy.

| Parameter                                                            | Estimate | Standard error ( <i>SE</i> ) | Z ratio | <i>p</i> | Cohen's <i>d</i>     |
|----------------------------------------------------------------------|----------|------------------------------|---------|----------|----------------------|
| <b>Emotion <math>\times</math> Group</b>                             |          |                              |         |          |                      |
| <i>Category-based contrast</i>                                       |          |                              |         |          |                      |
| Angry (older vs. younger)                                            | -1.81    | 0.15                         | -11.98  | < .001   | -1.81 [-2.10, -1.51] |
| Happy (older vs. younger)                                            | -0.86    | 0.13                         | -6.62   | < .001   | -0.86 [-1.11, -0.60] |
| Neutral (older vs. younger)                                          | -1.51    | 0.15                         | -10.08  | < .001   | -1.51 [-1.80, -1.22] |
| Sad (older vs. younger)                                              | -1.45    | 0.13                         | -11.14  | < .001   | -1.45 [-1.70, -1.19] |
| <i>Dimension-based contrast</i>                                      |          |                              |         |          |                      |
| Negative (older vs. younger)                                         | -1.57    | 0.12                         | -13.39  | < .001   | -1.57 [-1.80, -1.34] |
| Neutral (older vs. younger)                                          | -1.51    | 0.15                         | -10.08  | < .001   | -1.51 [-1.8, -1.21]  |
| Positive (older vs. negative)                                        | -0.85    | 0.13                         | -6.57   | < .001   | -0.85 [-1.1, -0.60]  |
| <b>Emotion <math>\times</math> Channel <math>\times</math> Group</b> |          |                              |         |          |                      |
| Angry face (older vs. younger)                                       | -1.75    | 0.27                         | -6.59   | < .001   | -1.75 [-2.28, -1.22] |
| Happy face (older vs. younger)                                       | -0.30    | 0.30                         | -1.01   | .315     | -0.30 [-0.87, 0.28]  |
| Neutral face (older vs. younger)                                     | -0.53    | 0.24                         | -2.18   | .030     | -0.53 [-1.01, -0.05] |
| Sad face (older vs. younger)                                         | -1.17    | 0.18                         | -6.67   | < .001   | -1.17 [-1.51, -0.82] |
| Angry prosody (older vs. younger)                                    | -2.52    | 0.26                         | -9.73   | < .001   | -2.52 [-3.02, -2.02] |
| Happy prosody (older vs. younger)                                    | -1.52    | 0.15                         | -9.92   | < .001   | -1.52 [-1.82, -1.22] |
| Neutral prosody (older vs. younger)                                  | -2.26    | 0.20                         | -11.07  | < .001   | -2.26 [-2.66, 1.86]  |
| Sad prosody (older vs. younger)                                      | -1.84    | 0.18                         | -10.01  | < .001   | -1.84 [-2.20, -1.48] |
| Angry semantics (older vs. younger)                                  | -1.40    | 0.18                         | -7.71   | < .001   | -1.40 [-1.76, -1.04] |
| Happy semantics (older vs. younger)                                  | -0.63    | 0.16                         | -3.98   | < .001   | -0.63 [-0.94, -0.32] |
| Neutral semantics (older vs. younger)                                | -1.55    | 0.23                         | -6.82   | < .001   | -1.55 [-1.99, -1.10] |
| Sad semantics (older vs. younger)                                    | -1.29    | 0.18                         | -7.18   | < .001   | -1.29 [-1.64, -0.94] |

*Notes.* The younger group was the baseline level when compared with the older group. For the Emotion  $\times$  Group interaction, we conducted category- and dimension-based analyses. Anger and sadness were combined as the negative dimension, while happiness was regarded as the positive dimension.
