# Supplementary material
Source: publisher figshare collection journal article supplement (https://asha.figshare.com/articles/dataset/_/27307251)
Supplement: Supplementary file 2 [file 1]

**Supplemental Material S2.** Pairwise contrasts for significant main effects and interactions in accuracy.

| Parameter                                | Estimate | Standard error (SE) | Z ratio | p      | Cohen's d            |
|------------------------------------------|----------|---------------------|---------|--------|----------------------|
| <b>Group</b>                             |          |                     |         |        |                      |
| Older vs. younger                        | -1.42    | 0.10                | -13.62  | < .001 | -1.42 [-1.63, -1.22] |
| <b>Channel × Group</b>                   |          |                     |         |        |                      |
| Older (face vs. prosody)                 | 1.43     | 0.07                | 20.01   | < .001 | 1.43 [1.29, 1.57]    |
| Older (face vs. semantics)               | 0.91     | 0.07                | 12.22   | < .001 | 0.91 [0.76, 1.05]    |
| Older (prosody vs. semantics)            | -0.52    | 0.06                | -9.30   | < .001 | -0.52 [-0.63, -0.41] |
| Younger (face vs. prosody)               | 0.59     | 0.11                | 5.15    | < .001 | 0.59 [0.37, 0.81]    |
| Younger (face vs. semantics)             | 0.83     | 0.11                | 7.51    | < .001 | 0.83 [0.61, 1.05]    |
| Younger (prosody vs. semantics)          | 0.24     | 0.09                | 2.54    | .030   | 0.24 [0.06, 0.43]    |
| <b>Emotion × Channel × Group</b>         |          |                     |         |        |                      |
| Older (angry: face vs. prosody)          | 0.83     | 0.13                | 6.20    | < .001 | 0.83 [0.57, 1.09]    |
| Older (angry: face vs. semantics)        | 0.87     | 0.13                | 6.54    | < .001 | 0.87 [0.61, 1.13]    |
| Older (angry: prosody vs. semantics)     | 0.04     | 0.11                | 0.34    | .937   | 0.04 [-0.18, 0.26]   |
| Younger (angry: face vs. prosody)        | 0.06     | 0.32                | 0.17    | .984   | 0.06 [-0.57, 0.68]   |
| Younger (angry: face vs. semantics)      | 1.22     | 0.26                | 4.65    | < .001 | 1.22 [0.70, 1.73]    |
| Younger (angry: prosody vs. semantics)   | 1.16     | 0.26                | 4.40    | < .001 | 1.16 [0.64, 1.68]    |
| Older (happy: face vs. prosody)          | 2.90     | 0.20                | 14.84   | < .001 | 2.90 [2.52, 3.29]    |
| Older (happy: face vs. semantics)        | 2.09     | 0.20                | 10.44   | < .001 | 2.09 [1.70, 2.49]    |
| Older (happy: prosody vs. semantics)     | -0.81    | 0.10                | -7.80   | < .001 | -0.81 [-1.01, -0.61] |
| Younger (happy: face vs. prosody)        | 1.68     | 0.24                | 7.15    | < .001 | 1.68 [1.22, 2.14]    |
| Younger (happy: face vs. semantics)      | 1.76     | 0.23                | 7.55    | < .001 | 1.76 [1.30, 2.22]    |
| Younger (happy: prosody vs. semantics)   | 0.08     | 0.14                | 0.58    | .832   | 0.08 [-0.20, 0.36]   |
| Older (neutral: face vs. prosody)        | 1.88     | 0.16                | 11.98   | < .001 | 1.88 [1.57, 2.19]    |
| Older (neutral: face vs. semantics)      | 0.95     | 0.17                | 5.64    | < .001 | 0.95 [0.62, 1.28]    |
| Older (neutral: prosody vs. semantics)   | -0.93    | 0.12                | -7.78   | < .001 | -0.93 [-1.16, -0.69] |
| Younger (neutral: face vs. prosody)      | 0.15     | 0.24                | 0.62    | .807   | 0.15 [-0.32, 0.63]   |
| Younger (neutral: face vs. semantics)    | -0.07    | 0.25                | -0.26   | .962   | -0.07 [-0.56, 0.43]  |
| Younger (neutral: prosody vs. semantics) | -0.22    | 0.25                | -0.88   | .652   | -0.22 [-0.70, 0.27]  |
| Older (sad: face vs. prosody)            | 0.39     | 0.11                | 3.57    | .001   | 0.39 [0.17, 0.60]    |
| Older (sad: face vs. semantics)          | 0.01     | 0.11                | 0.06    | .998   | 0.01 [-0.22, 0.23]   |
| Older (sad: prosody vs. semantics)       | -0.38    | 0.11                | -3.51   | .001   | -0.38 [-0.59, -0.17] |
| Younger (sad: face vs. prosody)          | -0.28    | 0.19                | -1.52   | .284   | -0.28 [-0.65, 0.08]  |
| Younger (sad: face vs. semantics)        | -0.12    | 0.18                | -0.64   | .796   | -0.12 [-0.47, 0.24]  |
| Younger (sad: prosody vs. semantics)     | 0.17     | 0.19                | 0.88    | .655   | 0.17 [-0.21, 0.54]   |

*Note.* (1) “*df*” stands for degree of freedom. (2) The semantic channel, sad emotion, and younger adults were set as the baseline level respectively. Prosody was set as the baseline level when it was compared with face. Neutrality was set as the default level when compared with anger and happiness, and happiness was the reference level when compared with anger. (3) pairwise contrasts are indented.
