# Supplementary material
Source: publisher figshare collection journal article supplement (https://asha.figshare.com/articles/dataset/_/27307251)
Supplement: Supplementary file 5 [file 1]

**Supplemental Material S5.** Pairwise contrasts of group differences for significant Channel  $\times$  Emotion  $\times$  Group interactions in reaction time.

| Parameter                                                            | Estimate | Standard error ( <i>SE</i> ) | Z ratio | <i>p</i> | Cohen's <i>d</i>  |
|----------------------------------------------------------------------|----------|------------------------------|---------|----------|-------------------|
| <b>Emotion <math>\times</math> Group</b>                             |          |                              |         |          |                   |
| <i>Category-based contrast</i>                                       |          |                              |         |          |                   |
| Angry (older vs. younger)                                            | 0.61     | 0.04                         | 15.61   | < .001   | 1.44 [1.26, 1.62] |
| Happy (older vs. younger)                                            | 0.53     | 0.04                         | 13.52   | < .001   | 1.25 [1.06, 1.43] |
| Neutral (older vs. younger)                                          | 0.67     | 0.04                         | 17.11   | < .001   | 1.57 [1.39, 1.75] |
| Sad (older vs. younger)                                              | 0.59     | 0.04                         | 15.06   | < .001   | 1.39 [1.21, 1.57] |
| <i>Dimension-based contrast</i>                                      |          |                              |         |          |                   |
| Negative (older vs. younger)                                         | 0.60     | 0.04                         | 15.57   | < .001   | 1.40 [1.22, 1.58] |
| Neutral (older vs. younger)                                          | 0.67     | 0.04                         | 17.14   | < .001   | 1.56 [1.38, 1.74] |
| Positive (older vs. negative)                                        | 0.53     | 0.04                         | 13.54   | < .001   | 1.24 [1.06, 1.42] |
| <b>Emotion <math>\times</math> Channel <math>\times</math> Group</b> |          |                              |         |          |                   |
| Angry face (older vs. younger)                                       | 0.69     | 0.04                         | 16.77   | < .001   | 1.63 [1.44, 1.82] |
| Happy face (older vs. younger)                                       | 0.58     | 0.04                         | 14.19   | < .001   | 1.37 [1.18, 1.56] |
| Neutral face (older vs. younger)                                     | 0.68     | 0.04                         | 16.65   | < .001   | 1.61 [1.42, 1.80] |
| Sad face (older vs. younger)                                         | 0.70     | 0.04                         | 17.00   | < .001   | 1.66 [1.47, 1.85] |
| Angry prosody (older vs. younger)                                    | 0.61     | 0.04                         | 14.68   | < .001   | 1.43 [1.24, 1.62] |
| Happy prosody (older vs. younger)                                    | 0.56     | 0.04                         | 13.32   | < .001   | 1.31 [1.12, 1.50] |
| Neutral prosody (older vs. younger)                                  | 0.69     | 0.04                         | 16.72   | < .001   | 1.63 [1.44, 1.83] |
| Sad prosody (older vs. younger)                                      | 0.59     | 0.04                         | 14.32   | < .001   | 1.40 [1.21, 1.59] |
| Angry semantics (older vs. younger)                                  | 0.53     | 0.04                         | 12.88   | < .001   | 1.26 [1.07, 1.45] |
| Happy semantics (older vs. younger)                                  | 0.45     | 0.04                         | 10.88   | < .001   | 1.06 [0.87, 1.25] |
| Neutral semantics (older vs. younger)                                | 0.63     | 0.04                         | 15.29   | < .001   | 1.48 [1.29, 1.68] |
| Sad semantics (older vs. younger)                                    | 0.47     | 0.04                         | 11.34   | < .001   | 1.11 [0.92, 1.30] |

*Note.* The younger group was the baseline level when compared with the older group. For the Emotion  $\times$  Group interaction, we conducted category- and dimension-based analyses. Anger and sadness were combined as the negative dimension, while happiness was regarded as the positive dimension.
